# Supplementary material
Source: PubMed Central journal article supplement (PMC4160386)
Supplement: NIHMS604205-supplement-1.pdf [file NIHMS604205-supplement-1.pdf]

## Supplementary Figures

A)

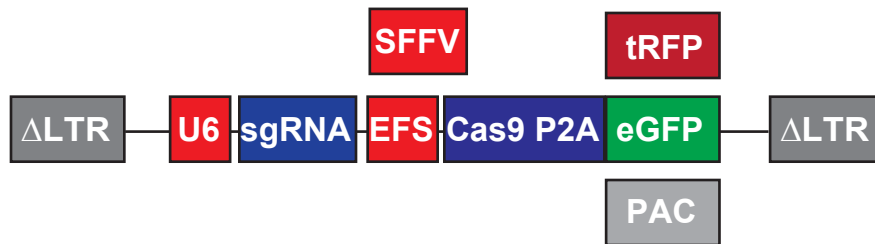

B)

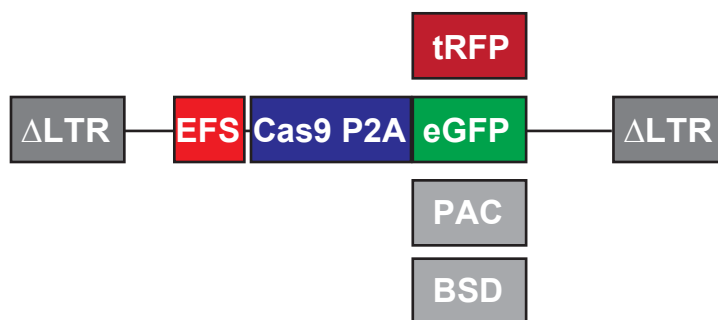

C)

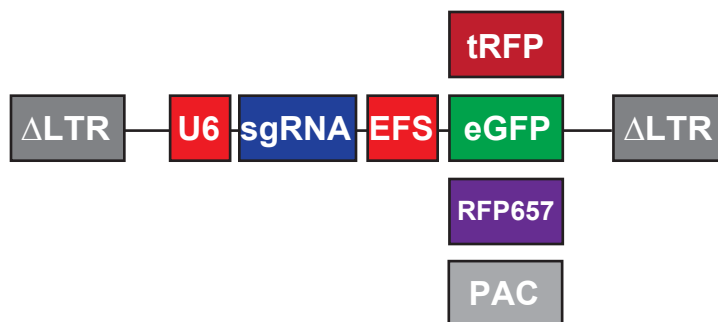

### Supplementary Figure 1 - A modular CRISPR/Cas lentiviral vector system for genome engineering

A) Schematic depiction of a lentiviral vector for bi-cistronic expression of the sgRNA from a U6 promoter (U6) and expression of Cas9 from a short *EF1a* promoter (EFS) or Spleen Focus Forming Virus (SFFV) promoter with a fluorescent protein marker (eGFP or tagRFP) or drug selectable marker (Purmomycin acetyl transferase (PAC) or Blasticidin deaminase (BSD)) from a picorna virus derived 2A auto-cleavage site (P2A). B) Depiction of a lentiviral vector for expression of Cas9 without the sgRNA. C) Depiction of a lentiviral vector for expression of the sgRNA only with a fluorescent protein marker or selectable marker form an EFS promoter.

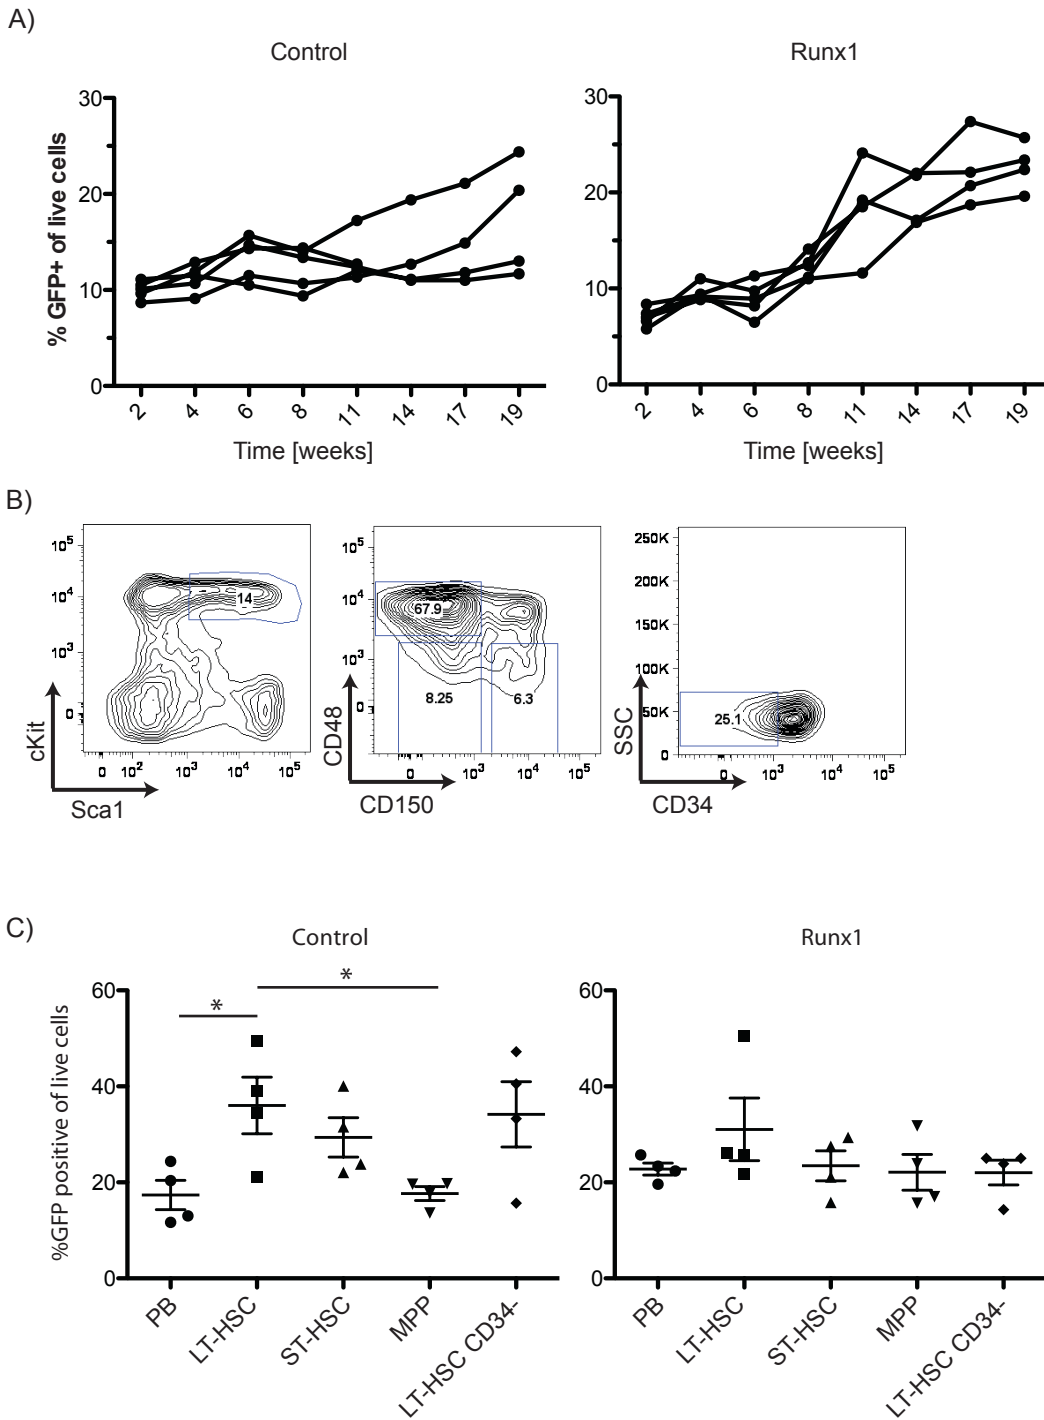

**Supplementary Figure 2 - sgRNA:Cas9 mediated knock out of *Runx1* in *Flt3-ITD* heterozygous HSCs induces a competitive advantage**

A) Flow cytometric assessment of sgRNA:Cas9 transduced cells in the peripheral blood of mice over 19 weeks (control sgRNA left; Runx1 sgRNA right).

B) Gating scheme of HSPC populations in mice transduced with sgRNA:Cas9 lentiviral vectors.

C) Summarized sgRNA:Cas9 vector expression in different HSPC populations at 19 weeks post transplantation for control sgRNA (left) or Runx1 sgRNA (right). Significant differences are indicated where applicable (t-test, two sided, unpaired; Welch corrected for comparisons with significantly different variances)

MPP = Multipotent progenitors (LSK CD150- CD48+); ST-HSC = short-term HSCs (LSK CD150- CD48-); LT-HSC = long-term HSCs (LSK CD150+ CD48-); LT-HSC CD34- = most quiescent long-term-HSCs (LSK CD150+ CD48- CD34-)



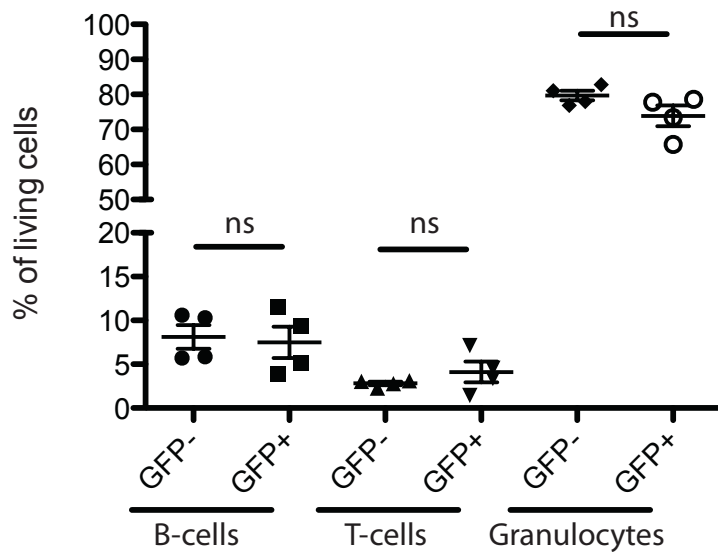

**Supplementary Figure 3 - sgRNA:Cas9 expression does not alter lineage maturation in the BM**

Flow cytometry based quantification of mature hematopoietic lineages within the GFP negative and GFP positive population in the BM of mice expressing Cas9 (GFP+) and a control sgRNA shows no significant differences (t-test, two sided, unpaired) in the maturation potential of Cas9 expressing cells.

A)

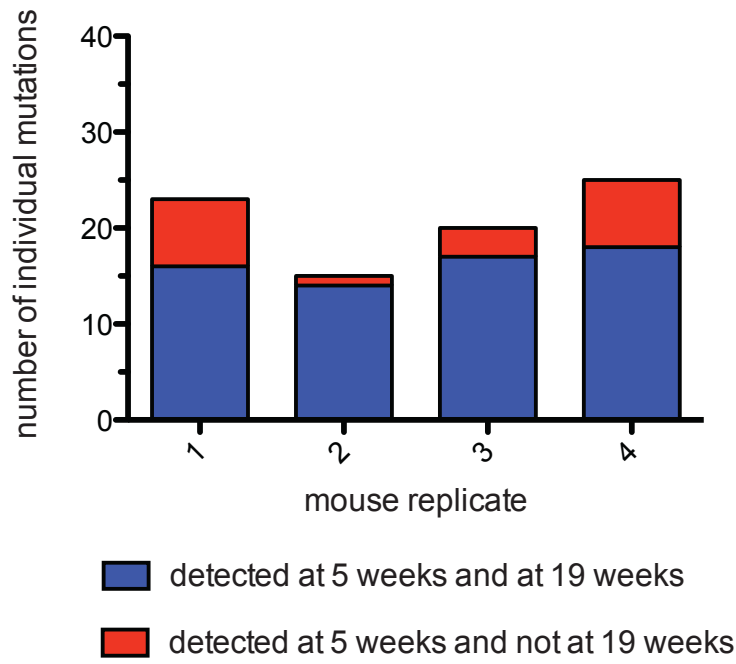

B)

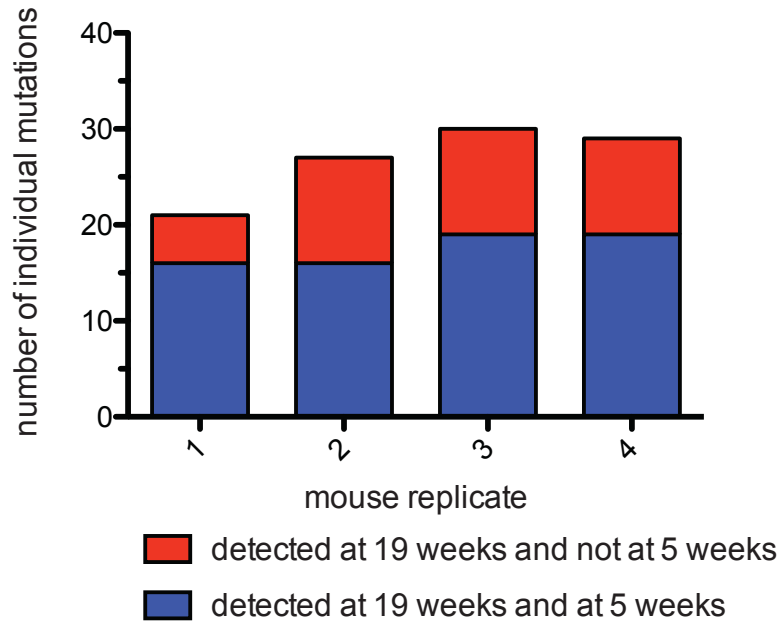

**Supplementary Figure 4 - Next Generation Sequencing shows stable genome modification in long-term repopulating HSCs *in-vivo***

Mutational analysis of peripheral blood samples at 5 weeks post-transplant and 19 weeks post-transplant. A) Samples were analyzed to detect all unique mutations from each mouse at 5 weeks and at 19 weeks for mutations at the *Runx1* target site. Mutations detected at both time points and only at 5 weeks are shown. B) Mutations found at 19 weeks but not at 5 weeks are shown.

A) sgRNA control

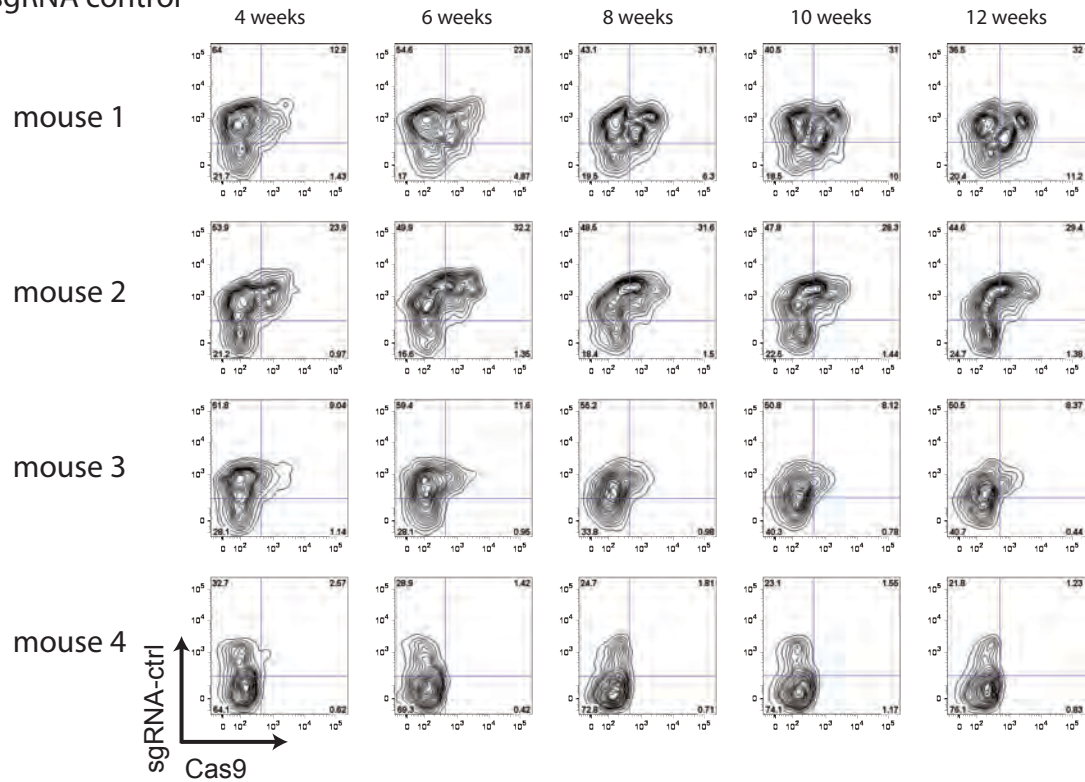

B) sgRNA-Pool

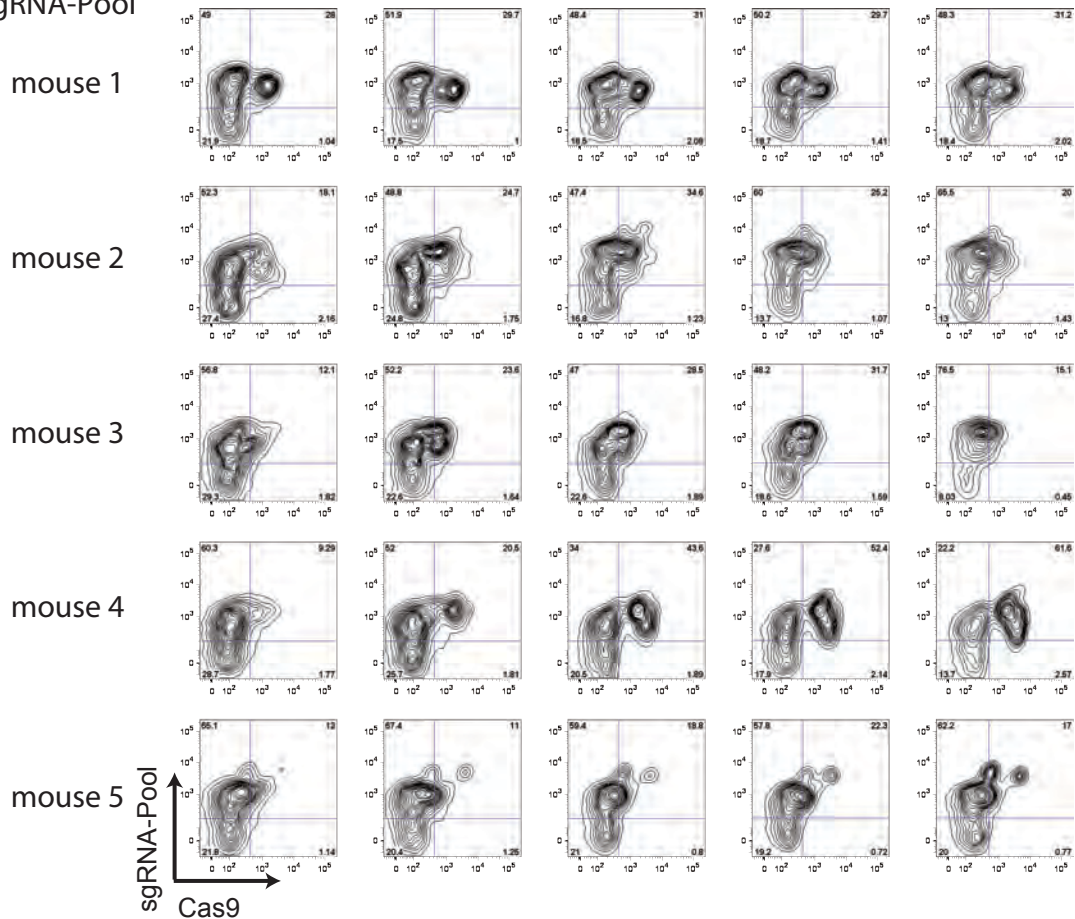

**Supplementary Figure 5 - Flow cytometry based clonality analysis of C57Bl/6 mice shows expansion of sgRNA:Cas9 engineered populations over time**

Flow cytometric assessment of sgRNA:Cas9 vector expression (eGFP) and sgRNA-only vector expression (RFP657) for control sgRNA (A) and pooled sgRNAs (B) in C57Bl/6 wild-type mice. Each row shows vector expression at the given time point from an individual mouse.



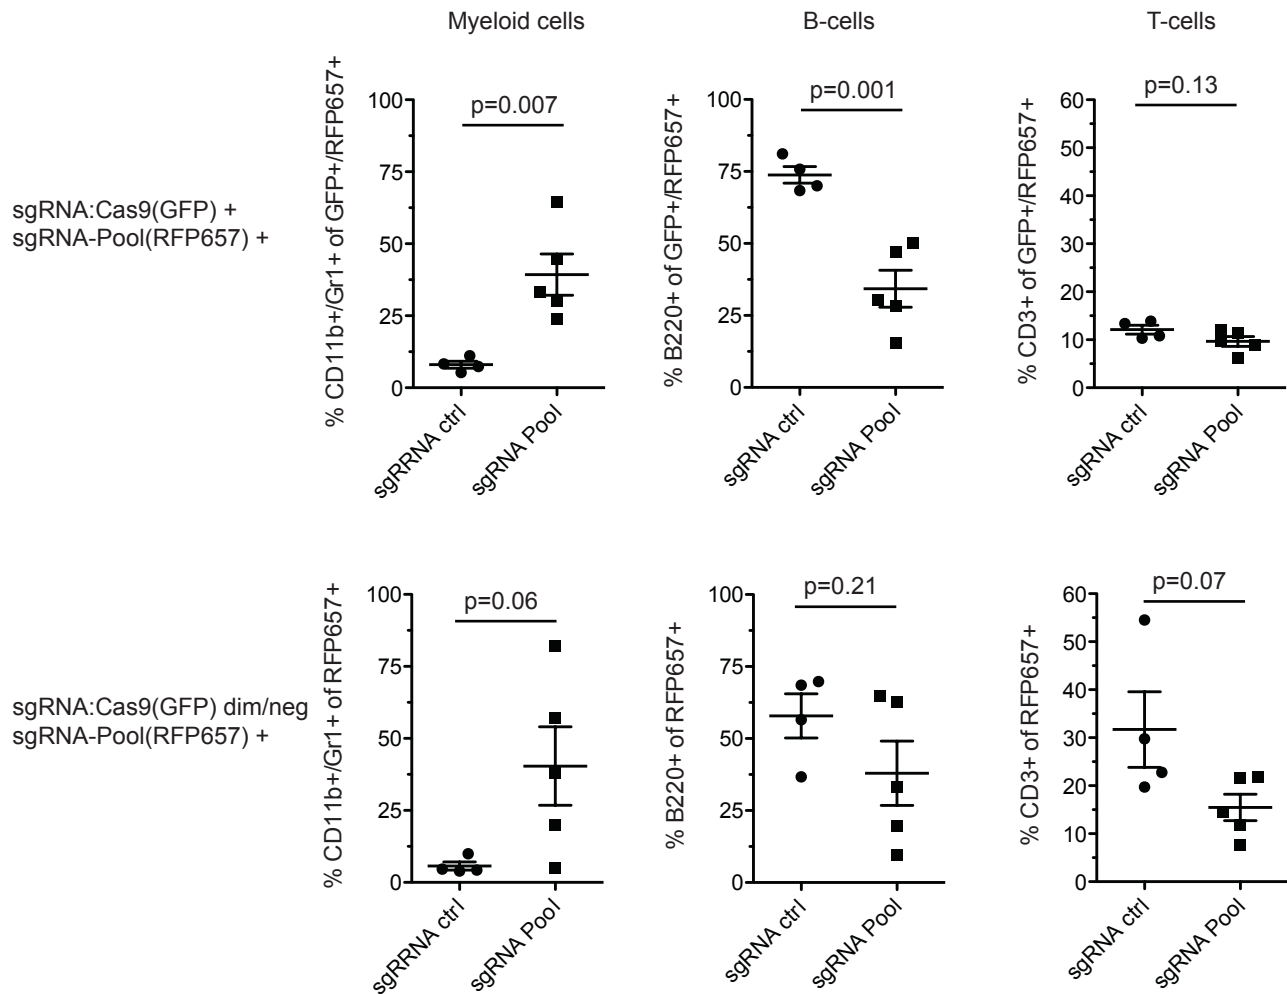

**Supplementary Figure 7 - Myeloid lineage skewing induced by multiplex CRISPR/Cas in eGFP-high and eGFP-dim sgRNA:Cas9 expressing populations**

Flow cytometric assessment of mature hematopoietic lineage distribution in mice transduced with sgRNA-control or sgRNA-pool 10 weeks post transplant (myeloid = CD11b+/Gr1+; B-cells=B220+; T-cells=CD3+. Mice are shown in Supplementary Figure 5.

Upper panel shows lineage distribution in the GFP+ / RFP657+ population of mice with the targeting sgRNA-Pool (sgRNA-Pool) compared to the non-targeting control (sgRNA-ctrl). Lower Panel shows lineage distribution in the GFP-dim/neg / RFP657+ population of mice with the targeting sgRNA-Pool (sgRNA-Pool) compared to the non-targeting control (sgRNA-ctrl). Statistical differences are indicated (t-test, two sided, unpaired; Welch corrected for comparisons with significantly different variances).

A)

*Tet2* GCGGG-----AGTAAAG23bp del (5/8)  
GCGGGAACAAGCTCTACA-----TAGGAAAGTAAAG5bp del (2/8)  
GCGGGAACAAGCTCTACATCCCGTAGGAAAGTAAAGwt (1/8)

*Dnmt3a* TCTTTCCCTGGTTGCCGCACCATGCC1bp ins (6/12)  
TCTTTC-----CCGCACCATGCC8bp del (4/12)  
TCTTTCCCTGG-----CATGCC9bp del (1/12)  
TCTTTCCCTGG-TGCCGCACCATGCCwt (1/12)

*Nf1* CAACTC-----ATGTGG5bp del (6/8)  
CAACTCCCTCGATGTGGwt (2/8)

*Runx1* ACTGGGGGACGT--CCGGATGGCA1bp del (5/10)  
ACTGGGGGACGTCCCCGGATGGCA1bp ins (3/8)  
ACTGGGGGACGT-CCCCGATGGCAwt (2/8)

B)

*Tet2* .CTTCCTACGG-ATGTAGAGCTTG' 1bp del (8/8)  
.CTTCCTACGGGAATGTAGAGCTTG' wt (0/8)

*Ezh2* ACCACC-----CCAGGG7bp del (3/7)  
ACCACCTAAAC--CCAGGG2bp del (4/7)  
ACCACCTAAACGCCCCAGGGwt (0/7)

*Nf1* TGTCT-----ATCTCT36bp del (4/8)  
TGTCTTTCAACAACTCCCTCGATGTGGCGGCTCATCTGCCCTATCTCT'wt (4/8)

*Runx1* CCATCCGGGGACG1bp ins (8/8)  
CCATCC-GGGACG'wt (0/8)

**Supplementary Figure 8 - Sequence alignments of genes mutated in putatively clonal hematopoietic sgRNA:Cas9 modified populations identified after multiplex sgRNA:Cas9 genome engineering**

A) Alignment of sequences obtained for targeted genes from sorted cell populations shown in Figure 2. The ratio of the number of bacterial clones with each sequence over the total clones sequenced for the respective gene is shown following each sequence. A) Genes found to be mutated in the clone shown in Figure 2C. B) Genes found to be mutated for the clone shown in Figure 2D.

PAM underlined

```

Dnmt3a  CCAAGT-----CCTTCC181bp del (10/10)
        CCAAGTGGACCGCTACAT//TTGCCATCCACTCCTTCCwt (0/10)

Ezh2    GACACC-----CCCAGG 9bp del (6/11)
        GACACCACCT-----CCCAGG 5bp del (5/11)
        GACACCACCTAAACGCCAGG wt (0/11)

Smc3    GGTGAT-----TATTAC 33bp del (9/9)
        GGTGATCAAAGTCAGCCATCGAGGTGCTCTGACTGGAGGTTATTAC wt (0/9)

Nf1     ATGCTG-----CCCTAT 36bp del (4/9)
        ATGCTGTCCTTCAACAACCTCCCTC-ATGTGGCGGCTCATCTGCCCTAT 1bp del (5/9)
        ATGCTGTCCTTCAACAACCTCCCTCGATGTGGCGGCTCATCTGCCCTAT wt (0/9)

```

**Supplementary Figure 9 - Sequence alignments of *Dnmt3a*, *Ezh2*, *Smc3*, and *Nf1* mutations in AML cells**

Alignment of sequences obtained for targeted genes from sorted leukemic cells shown in Figure 3A. The ratio of the number of bacterial clones with each sequence over the total clones sequenced for the respective gene is shown following each sequence.

PAM underlined (due to deletion size not possible for *Dnmt3a*)

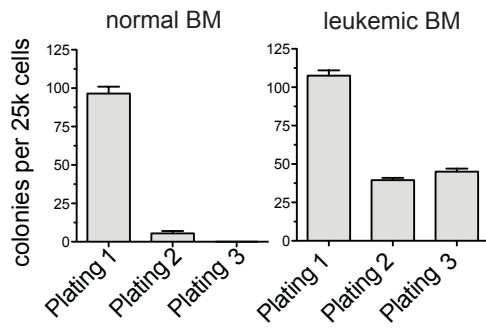

**Supplementary Figure 10 - Leukemia induced by sgRNA:Cas9 genome editing shows enhanced replating capacity**

Serial replating capacity of normal BM compared to the leukemic BM cells from the leukemia presented in Figure 3.



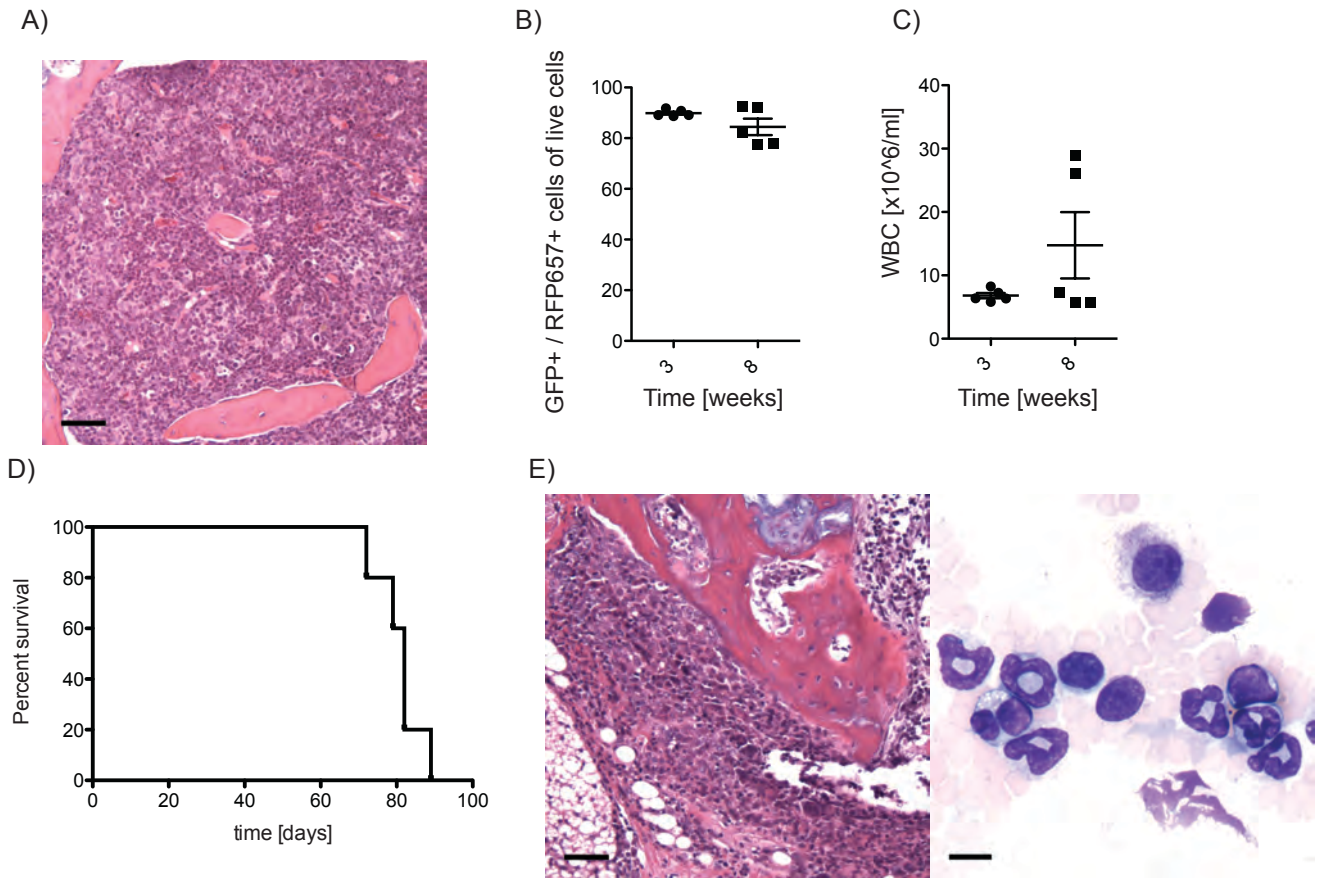

**Supplementary Figure 11 - Primary sgRNA:Cas9 induced leukemia engrafts in secondary mice and re-initiates disease**

A) Low magnification (200x, HE) BM histology of the leukemic mouse presented in Figure 3. Scale bar (25µm) given in the lower right.

B) Engraftment of primary leukemia cells in sublethally irradiated secondary recipients as assessed by flow cytometry for eGFP and RFP657 at 3 and 8 weeks post transplant. C) WBC counts of the same secondary mice at 3 and 8 weeks post transplant.

D) Survival of the secondary mice.

E) Low magnification (200x, HE) BM histology of a leukemic secondary mouse (left) and high magnification peripheral blood smear (MGG, 1000x) of a leukemic secondary mouse (right). Scale bar (25µm for 200x; 5µm for 1000x) given in the lower left.

A)

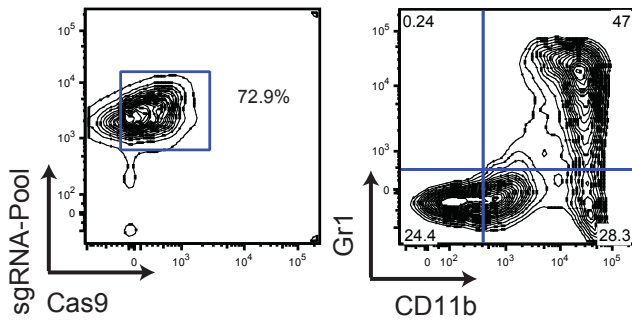

B)

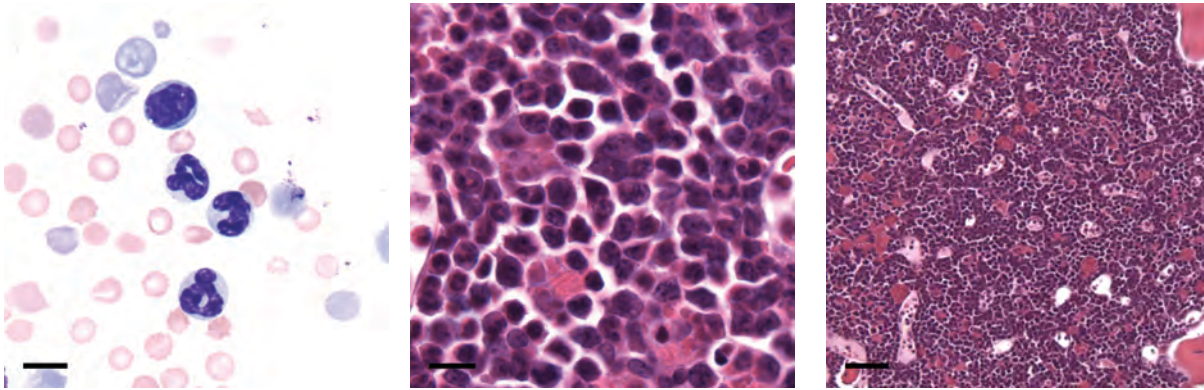

C)

*Tet2* CCTACG--ATGTAG 1bp del (4/5)  
CCTACGGGAATGTAG wt (1/5)

GCGGCA----GGAAAAG 4bp del (1/13)  
 GCGGCACCAGGGAAAAG wt (2/13)\*

*Dnmt3a* CCTCCG-----CAGCGT 73bp del (2/13)  
 CCTCCGAGGTTGTTGAGGACTCCATC//ATGTACGTCGGGGACGTCCGCAGCGTwt (2/13)\*  
 CCTGCT-----GTCACA 216bp del (8/13)  
 CCTGCTGTGCATCTGGCAAGACAAGT//ACGTCGGGGACGTCCGCAGCGTCA wt (2/13)\*

*Runx1* GGTTGA-----CGTCAT 48bp del (5/10)  
 GGTTGACGICTAGGTGGTGGCACTGGGGGACGT-CCGGATGGCACTCTGGTCACCGTCAT 1bp del (5/10)  
 GGTTGACGICTAGGTGGTGGCACTGGGGGACGTCCCGGAIGGCACTCTGGTCACCGTCAT wt (0/10)

*Nf1* TCAACA-----GTCATC 18bp del (1/8)  
 TCAACAACCTCC-----CICATC 13bp del (2/8)  
 TCAACAACCTCCCTCGCGATGTGGCGGCATC 2bp ins (5/8)  
 TCAACAACCTCCCTCG--ATGTGGCGGGCTCATC wt (0/8)

*Ezh2* ICTICT-----GCAGTA 40bp del (4/8)  
 ICTICTGCGGGCCCCCTGGGAGCGTTTAGGTGGTGTCTTTATACGCTCAGCAGTA 2bp ins (4/8)  
 ICTICTGCGGGCCCCCCTGGG--CGTTTAGGTGGTGTCTTTATACGCTCAGCAGTA wt (0/8)

**Supplementary Figure 12 - Characterization of a CRISPR/Cas induced myeloid leukemia in a C57Bl/6 with *Tet2*, *Dnmt3a*, *Runx1*, *Nf1*, and *Ezh2* mutation**

A) Flow cytometric assessment of sgRNA:Cas9 vector expression (eGFP),sgRNA-only vector expression (RFP657) for pooled sgRNAs (left), and myeloid lineage marker expression (right) in a leukemic mouse transplanted with C57Bl/6 donor cells that presented with leukocytosis ( $33.6 \times 10^6/\text{ml}$ ) and splenomegaly (412mg). B) High magnification peripheral blood smear (MGG, 1000x) of the leukemic mouse (left). Low magnification (200x, HE) BM histology (middle) and high magnification BM histology (1000x, HE) (right) of the leukemic mouse. Scale bars (25 $\mu\text{m}$  for 200x; 5 $\mu\text{m}$  for 1000x) are given in the lower left C) Mutation analysis on targeted genomic regions showed mutations in *Tet2*, *Dnmt3a*, *Runx1*, *Nf1*, and *Ezh2*. PAM underlined (due to deletion size not possible for some *Dnmt3a* sequences)

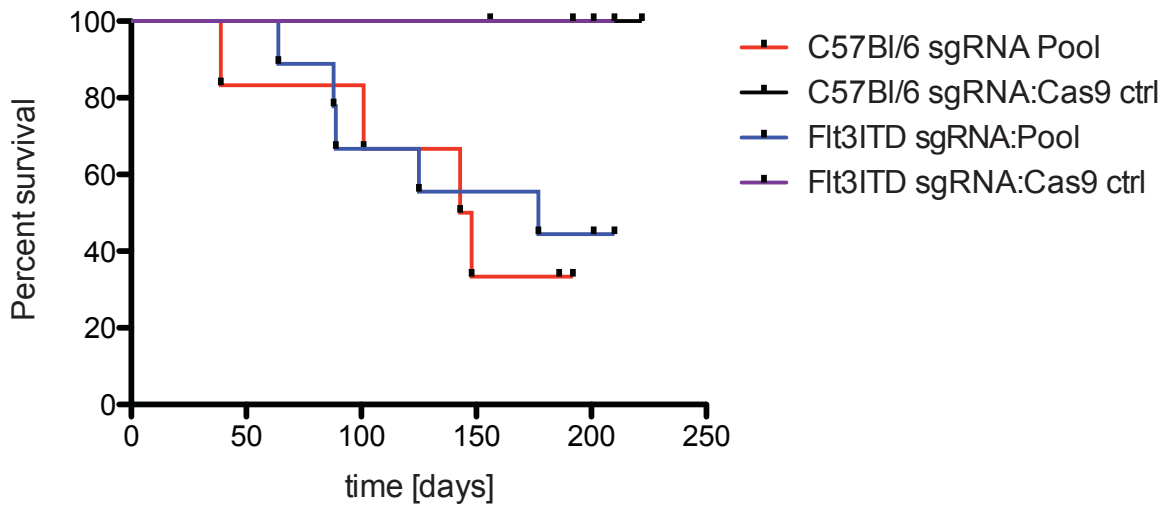

**Supplementary Figure 13 - Survival of mice transplanted with pooled sgRNAs targeting tumor suppressor genes**

Survival of C57Bl/6 mice with the targeting sgRNA-pool and Cas9 or non-targeting sgRNA and Cas9, and Flt3-ITD heterozygous mice transplanted targeting sgRNA-Pool.

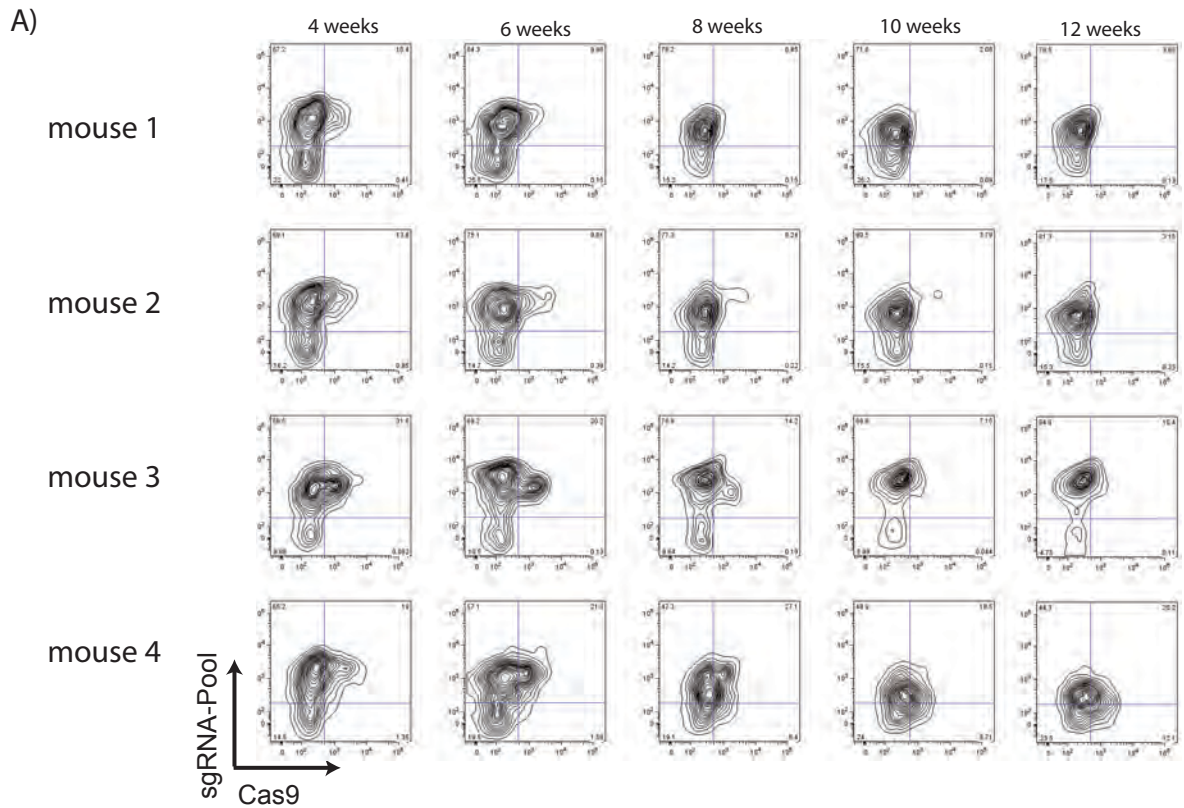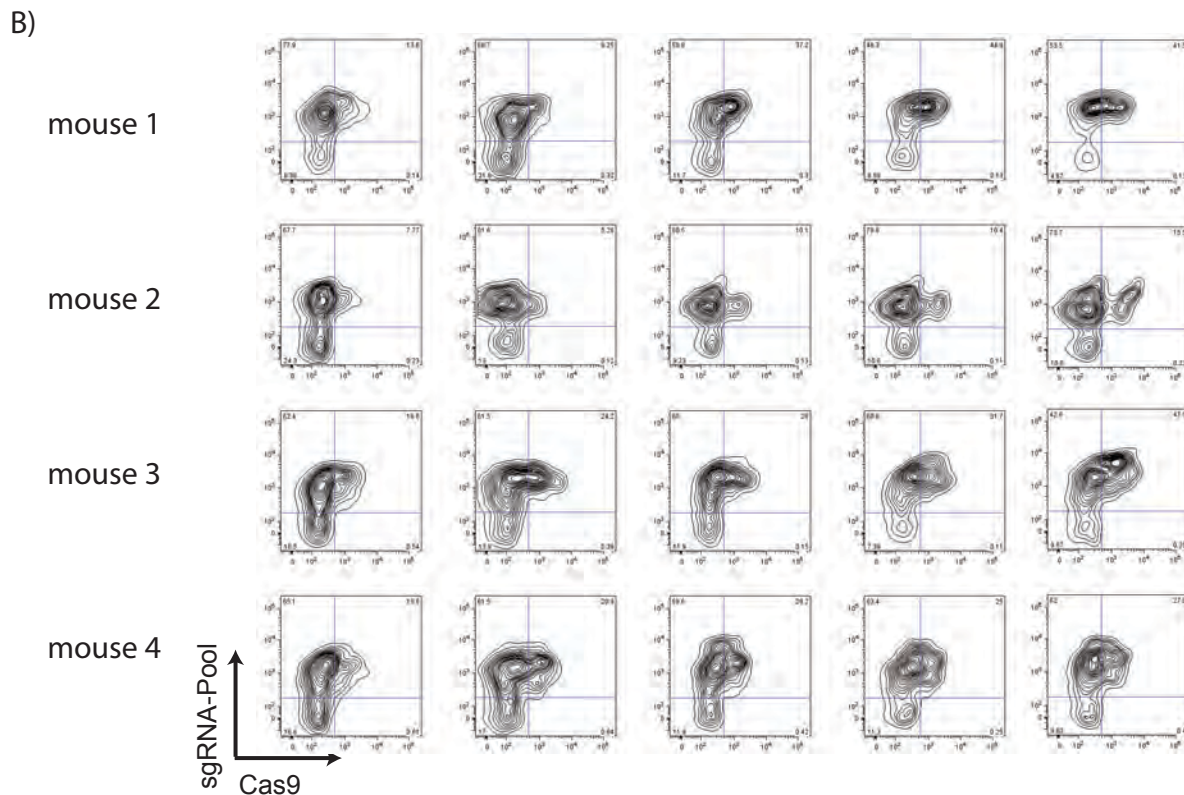

**Supplementary Figure 14 - Flow cytometry based clonality analysis of Flt3-ITD heterozygous mice shows expansion of sgRNA: Cas9 engineered populations over time**

Flow cytometric assessment of sgRNA:Cas9 vector expression (eGFP) and sgRNA-only vector expression (RFP657) for pooled sgRNAs in Flt3-ITD heterozygous mice. A) The *Runx1* targeting sgRNA was provided with the Cas9. B) The *Tet2* sgRNA was provided with the Cas9. Each row shows vector expression at the given time point from an individual mouse.



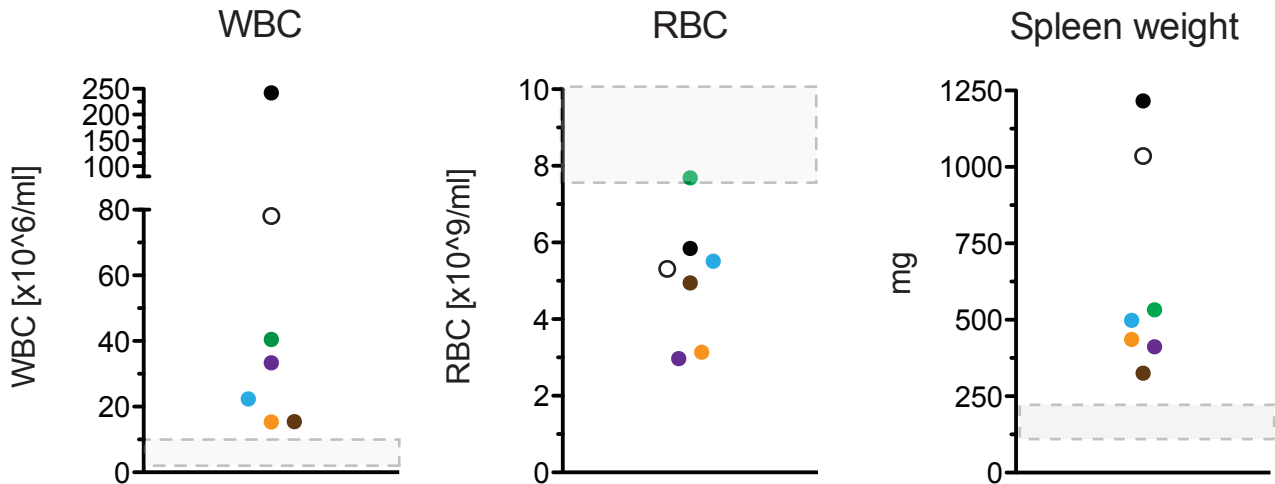

| Figure                  | Donor        | Colour |
|-------------------------|--------------|--------|
| Figure 3                | C57Bl/6      | Orange |
| Supplementary Figure 12 | C57Bl/6      | Purple |
| Supplementary Figure 16 | Flt3-ITD het | Brown  |
| Supplementary Figure 17 | Flt3-ITD het | Green  |
| Supplementary Figure 18 | Flt3-ITD het | White  |
| not further analyzed    | Flt3-ITD het | Black  |
| not further analyzed    | Flt3-ITD-het | Blue   |

**Supplementary Figure 15 - Summarized blood counts and spleen weights from leukemic mice**

Summarized WBC (left), RBC (middle), and spleen weight of leukemic mice presented in the study. Each mouse is presented in all three plots by one colour. A legend where data has been presented is given below. Range of control mice for each value is given as grey boxes. Control spleen weights are from Flt3-ITD control mice presented in Figure 1E/F and Supplementary Figure 3.

A)

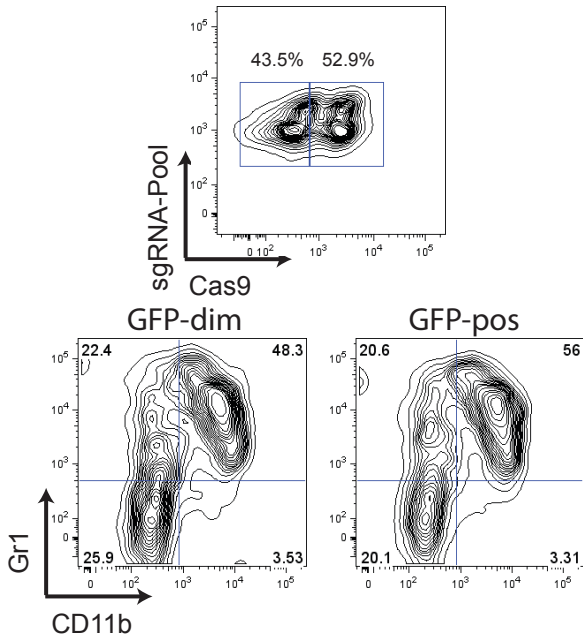

B)

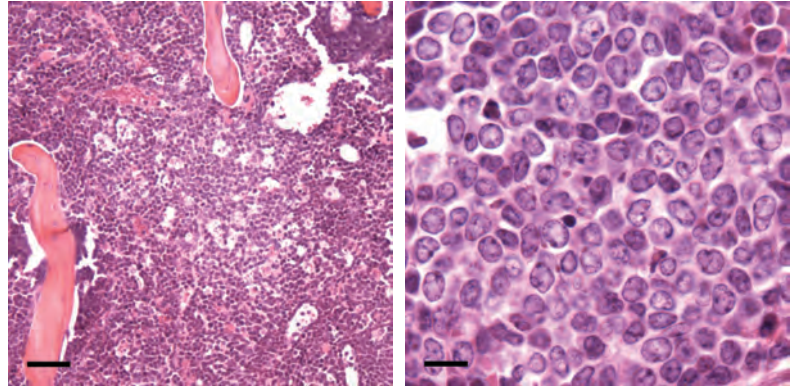

C)

**Tet2 GFP dim**  
 AGGTCT-----CACAAAG 33bp del (3/7)  
 AGGTCTTACTTCTCTA-----CACAAAG 25bp del/2bp ins (4/7)  
 AGGTCTTACTTCTCTACGGGATGTAGAGCTTGTTCCTCCGCTCACAAAG wt (0/7)

**Tet2 GFP pos**  
 TGCAGG-----CTCACAAAG 41bp del (4/7)  
 TGCAGGTTTGAGGCTTACTTCTCTA-----CACAAAG 25bp del/2bp ins (3/7)  
 TGCAGGTTTGAGGCTTACTTCTCTACGGGATGTAGAGCTTGTTCCTCCGCTCACAAAG wt (0/7)

**Nf1 GFP dim**  
 CCGCTACATGCTGATGCTGTCTTCAACAACCTCCCTCGAAACCATGTGGCGGCTCATCTGCCCTATCTCTT 5bp ins (1/7)  
 CCGCTACATGCTGATGCTGTCTCT-----ATCTCTT 37bp del (2/7)  
 CCGCTA-----TCTCTT 54bp del (3/7)  
 CCGCTACATGCTGATGCTGTCTTCAACAACCTCCCTCGA-----TGTGGCGGCTCATCTGCCCTATCTCTT wt (1/7)

**Nf1 GFP pos**  
 CCGCTA-----TCTCTT 54bp del (4/8)  
 CCGCTACATGCTGATGCTGTCTCT-----ATCTCTT 37bp del (4/8)  
 CCGCTACATGCTGATGCTGTCTTCAACAACCTCCCTCGATGTGGCGGCTCATCTGCCCTATCTCTT wt (0/8)

**Dnmt3a GFP dim**  
 TGGGCA-----CGTCGGGG 30bp del (1/7)  
 TGGGCATGGTGGGCAACCAGGGAAAAGATCATGTACGTCGGGG 1bp ins (3/7)  
 TGGGCATGGTGGG-----TCGGGG 23bp del (3/7)  
 TGGGCATGGTGGGCA-CCAGGGAAAAGATCATGTACGTCGGGG wt (0/8)

**Dnmt3a GFP pos**  
 GGTGGG-----TCGGGG 30bp del (1/7)  
 GGTGGG-A-CCAGGGAAAAGATCATGTACGTCGGGG 1bp del (2/7)  
 GGTGGGCAACCAGGGAAAAGATCATGTACGTCGGGG 1bp ins (3/7)  
 GGTGGGCA-CCAGGGAAAAGATCATGTACGTCGGGG wt (1/7)

**Runx1 GFP dim**  
 GACGTCCC GGATGG 1bp ins (2/8)  
 GACGTC-----GGATGG 2bp del (4/8)  
 GACGTCC-----GGATGG 1bp del (2/8)  
 GACGTCCC-GGATGG wt (0/7)

**Runx1 GFP pos**  
 AGGTGG-----ATGGCA 20bp del (2/8)  
 AGGTGGTGGCACTGGGGGACGTC-----GGATGGCA 2bp del (1/8)  
 AGGTGGTGGCACTGGGGGACGTC-----GGATGGCA 1bp del (5/8)  
 AGGTGGTGGCACTGGGGGACGTCCTCCGGATGGCA|wt (0/7)

**Ezh2 GFP dim**  
 CCTAAACG--CAGGGG 2bp del (2/7)  
 CCTAAA-----CCCAGGGG 2bp del (5/7)  
 CCTAAACGCCCAAGGGG wt (0/7)

**Ezh2 GFP pos**  
 CACCTA-----CCCAGGGG 4bp del (3/5)  
 CACCTAAA-----CCCAGGGG 2bp del (2/5)  
 CACCTAAACGCCCAAGGGG wt (0/5)

### Supplementary Figure 16 - Characterization of a Cas9:sgRNA induced myeloid leukemia in a Flt3-ITD heterozygous mouse

A) Flow cytometric assessment of sgRNA:Cas9 vector expression (eGFP), sgRNA-only vector expression (RFP657) (upper panel) in a leukemic mouse that presented with mild leukocytosis ( $15.4 \times 10^6/\text{ml}$ ) and splenomegaly (326mg). Myeloid marker expression (lower panel) was assessed both in GFP-dim cells (left) and GFP-pos cells (right).

B) Low magnification (200x, HE) BM histology (left) and high magnification BM histology (1000x, HE) (right) of the leukemic mouse.

Scale bar (25 $\mu\text{m}$  for 200x; 5 $\mu\text{m}$  for 1000x) are given in the lower left.

C) Mutation analysis on targeted genomic regions. Mutations were assessed for both flow sorted GFP-dim and GFP-pos cells. Redundant mutation on one allele in *Tet2*, *Nf1*, *Dnmt3a*, *Runx1*, and *Ezh2* suggests subclonal architecture. PAM underlined

A)

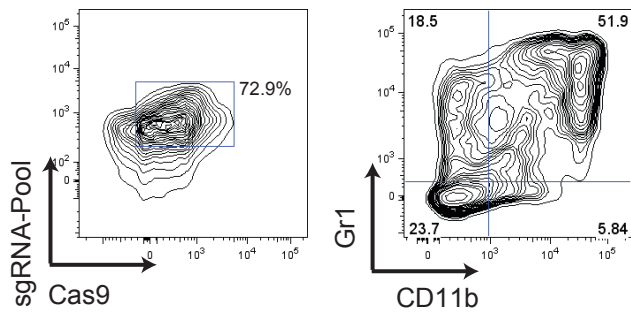

B)

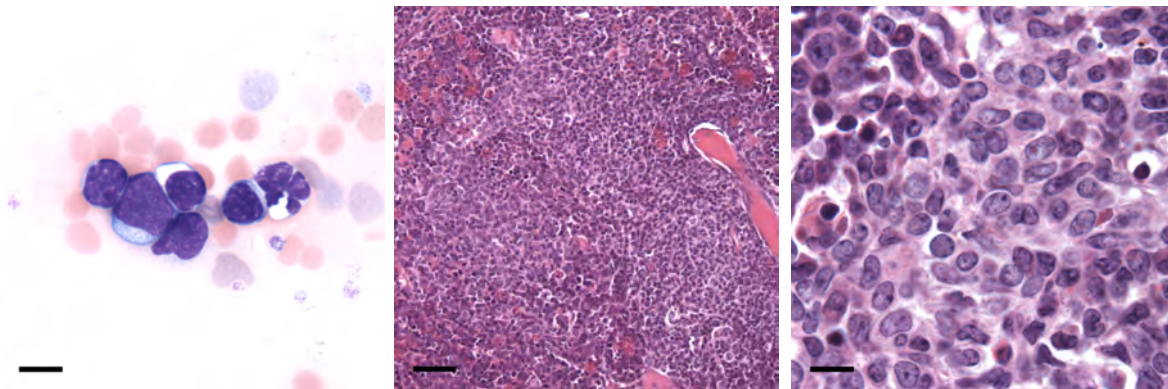

C)

*Runx1* GGGGACGTCCCGGATGGCA 1bp ins (8/8)  
GGGGACGT-CCCGGATGGCA wt (0/8)

*Nf1* GGCAGATGAGCCGCCACAT-GAGGGAGTIGTTGAAGG 1bp del (5/8)  
GGCAGA-----TGAAGG 25bp del(2/8)  
GGCAGATGAGCCGCCACATCGAGGGAGTIGTTGAAGG wt (1/8)

*Ezh2* ACTGCT-----TCCGAA 53p del (5/9)  
ACTGCTGAGCGTATAAAGACACCACCTAAACGCCCGGGGGCCGCAGAAAGAGGAAGACTTCCGAA wt (4/9)

### Supplementary Figure 17 - Characterization of a sgRNA:Cas9 induced myeloid leukemia in a *Flt3-ITD* heterozygous mouse

A) Flow cytometric assessment of sgRNA:Cas9 vector expression (eGFP), sgRNA-only vector expression (RFP657) (left) and myeloid lineage marker expression (right) in a leukemic mouse with leukocytosis ( $40.4 \times 10^6/\text{ml}$ ) and splenomegaly (533mg). Expression of myeloid markers (right).

B) High magnification peripheral blood smear (MGG, 1000x) of the leukemic mouse (left). Low magnification (200x, HE) BM histology (middle) and high magnification BM histology 1000x, HE) (right) of the leukemic mouse. Scale bar (25 $\mu\text{m}$  for 200x; 5 $\mu\text{m}$  for 1000x) are given in the lower left.

C) Mutation analysis on targeted genomic regions showed mutations in *Runx1*, *Nf1*, and *Ezh2*.

PAM underlined



A)

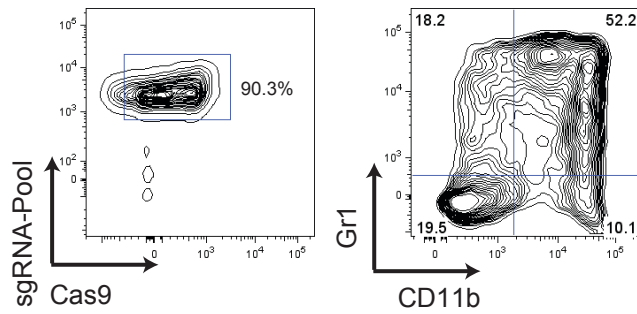

B)

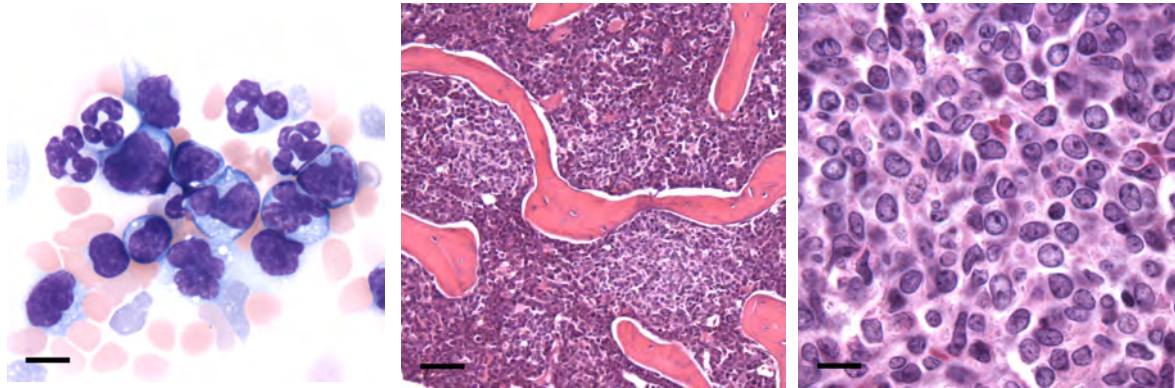

C)

*Tet2* TTACTTCCTACG--AIGTAGAGCTTGTCCCGCTCACA 2bp del (3/7)  
 TTACTTAA-----CTCACA 26bp del/1bp ins (3/7)  
 TTACTTCCTACGGGATGTAAGAGCTTGTCCCGCTCACA wt (1/7)

*Runx1* TGGGGGACG--CGGATGGCA 3bp del (5/9)  
 TGGGGGACGTC-CGGATGGCA 1bp del (4/9)  
 TGGGGGACGTCCCGGATGGCA wt (0/9)

*Dnmt3a* CATGGT-----AAGATC 13bp del (6/9)  
 CATGGTGGGGCACCAGGGAAAGATC wt (3/9)

*Nf1* TTCAAC-----CTAICT 29bp del (2/8)  
 TTCAACAACCTCCCTCGGA-TTGGCGGCTCATCTGCCCTAICT 1bp ins/2bp change (2/8)  
 TTCAACAACCTCCCTCGGGTIGGGCGGCTCATCTGCCCTAICT 2bp ins/1bp change (2/8)  
 TTCAACAACCTCCCTCGAGATGTGGCGGCTCATCTGCCCTAICT 2bp ins (1/8)  
 TTCAACAACCTCCCTCGA--TGTGGCGGCTCATCTGCCCTAICT wt (1/8)

*Ezh2* TAAAGA-----AGAGGA 27p del (6/9)  
 TAAAGACACCACCTAAACGC--AGGGGGCCGCAGAAGAGGA 2bp del (3/9)  
 TAAAGACACCACCTAAACGCCAGGGGGCCGCAGAAGAGGA wt (0/9)

**Supplementary Figure 18 - Characterization of a sgRNA:Cas9 induced myeloid leukemia in a Flt3-ITD heterozygous mouse with**

A) Flow cytometric assessment of sgRNA:Cas9 vector expression (eGFP), sgRNA-only vector expression (RFP657) (left) and myeloid lineage marker expression (right) in a leukemic mouse with leukocytosis ( $78.1 \times 10^6/\text{ml}$ ) and splenomegaly (1036mg) and myeloid marker expression. Expression of myeloid markers (right).

B) High magnification peripheral blood smear (MGG, 1000x) of the leukemic mouse (left). Low magnification (200x, HE) BM histology (middle) and high magnification BM histology 1000x, HE) (right) of the leukemic mouse. Scale bar (25 $\mu\text{m}$  for 200x; 5 $\mu\text{m}$  for 1000x) are given in the lower left.

C) Mutation analysis on targeted genomic regions showed mutations in *Tet2*, *Runx1*, *Dnmt3a*, *Nf1*, and *Ezh2*. PAM underlined



Supplementary Table 1 – Target sites and efficacies

| Targeted Gene | Targeted Sequence                | Efficacy (Reporter) |
|---------------|----------------------------------|---------------------|
| <b>Runx1</b>  | GCACTGGGGGACGTCCCCGGAT <u>GG</u> | 0.17                |
| <i>Runx1</i>  | CCAGCGACACCCATTTCA <u>CCGG</u>   | 0.20                |
| <i>Runx1</i>  | <u>CCG</u> TGCCAGCGGCATGACCAGCC  | 0.81                |
| <i>Tet2</i>   | <u>CCG</u> TGCAGAGTACCGCATCTCAT  | 0.66                |
| <i>Tet2</i>   | AATACTATCCTAGTTCCGAC <u>CCGG</u> | 0.10                |
| <b>Tet2</b>   | GAACAAGCTCTACATCCCGT <u>AGG</u>  | 0.11                |
| <b>Dnmt3a</b> | GTGGGCATGGTGCGGCACCA <u>GGG</u>  | 0.44                |
| <i>Dnmt3a</i> | CACC GCATGATGCGCGCCCAAGG         | 0.50                |
| <i>Dnmt3a</i> | CACC GCTTACCAGTATGACGACGA        | 0.86                |
| <i>Nf1</i>    | <u>CCA</u> GTTACCGGGACCGCTCCTTC  | 1.03                |
| <b>Nf1</b>    | <u>CCCT</u> CGATGTGGCGGCTCATCTG  | 0.55                |
| <i>Nf1</i>    | <u>CCT</u> CGATGTGGCGGCTCATCTGC  | 0.66                |
| <i>Ezh2</i>   | CTGAGAAGGGACCGGTTTGT <u>TGG</u>  | 0.77                |
| <i>Ezh2</i>   | <u>CCG</u> GTTTGTGGCGGAAGCGTGT   | 1.10                |
| <b>Ezh2</b>   | AAGACACCACCTAAACGCC <u>CAGG</u>  | 0.61                |
| <i>Smc3</i>   | AAAGCTGATAAAGCGGCAAG <u>AGG</u>  | 0.34                |
| <b>Smc3</b>   | <u>CCAT</u> CGAGGTGCTCTGACTGGAG  | 0.39                |
| <i>Asx1</i>   | CAACAGTGCCATTCGAGGCC <u>CAGG</u> | 0.88                |
| <i>Asx1</i>   | GATACTAAAACCGACTTAGC <u>CAGG</u> | 1.01                |
| <i>Asx1</i>   | AGCCCAAAGTCCCGCCCAT <u>CCGG</u>  | 1.07                |
| <i>p53</i>    | AGAAGAAAATTTCCGCAAAA <u>AGG</u>  | 1.01                |
| <i>p53</i>    | <u>CCCT</u> GAACTGCCCCAGGGAGCG   | 1.10                |
| <i>p53</i>    | <u>CCACT</u> ACAAGTACATGTGTAATA  | 1.11                |

PAM sequence underlined

bold: target sites used for in-vivo experiments

Efficacy describes the relative fluorescence compared to control target site

Supplementary Table 2 – Genotyping of methylcellulose colonies

|                  | Primary genotype |         |           |                     |                    |          | Colonies with primary genotype | Colonies wt | Colonies with divergent genotype |
|------------------|------------------|---------|-----------|---------------------|--------------------|----------|--------------------------------|-------------|----------------------------------|
|                  | Tet2             | Runx1   | Dnmt3a    | Nf1                 | Ezh2               | Smc3     |                                |             |                                  |
| Figure3          | wt               | wt      | 181bp del | 36bp del / 1bp del  | 5bp del / 9 bp del | 33bp del | 5/5                            | 0/5         | 0/5                              |
| Suppl. Figure 15 | wt               | 1bp ins | wt        | 1bp del / 25 bp del | 53 bp del / wt     | wt       | 4/5                            | 1/5         | 0/5                              |

Supplementary Table 3 – Off-target sites of sgRNA target sites used for in-vivo studies

| target   | guide sequence          | on-target locus | off target name | off target sequence     | mismatches        | UCSC gene    | locus            | genic location                 |
|----------|-------------------------|-----------------|-----------------|-------------------------|-------------------|--------------|------------------|--------------------------------|
| Runx1.1  | GCACTGGGGGACGTCCCGGATGG | chr16:+92689348 | Runx1_OT1       | GCCTGGGGGATGCGCGGATGG   | 3MMs [3:12:15]    | NM_019732    | chr4:+134711201  | Runx3 exon                     |
|          |                         |                 | Runx1_OT2       | GCCTGGGGGACGTCCGGGAGAG  | 4MMs [3:10:11:17] | NM_011801    | chr8:+114377958  | Cfdp1 intron,CpG island        |
|          |                         |                 | Runx1_OT3       | GCACTGGTGGAGTTCGGGATGG  | 4MMs [2:8:12:15]  | NM_001136058 | chr5:-37680166   | Crmp1 exon                     |
|          |                         |                 | Runx1_OT4       | GGACGCGGGACGCGCCGGAGAG  | 4MMs [2:5:7:14]   | NM_145837    | chr14:+58143823  | Il17d intron, CpG island       |
|          |                         |                 | Runx1_OT5       | GCTCTGGGGGCCCTCCGGGGAG  | 4MMs [3:11:13:20] | NM_027711    | chr13:+96661671  | Iqgap2 exon, CpG island        |
| Nf1.2    | CAGATGAGCCGCCACATCGAAGG | chr11:-79360625 | Nf1_OT1         | CCGAGGAGCCCAACATCGTAAG  | 4MMs [2:5:13:20]  | NM_177213    | chr7:-127505021  | Abca15 exon                    |
|          |                         |                 | Nf1_OT2         | GAGATGAGCAGCGACATCAATGG | 4MMs [1:10:13:19] | NM_178017    | chr8:-77547985   | Hmgxb4 exon                    |
|          |                         |                 | Nf1_OT3         | CAGGTGAGCTGCAACATCTACGG | 4MMs [4:10:13:19] | NM_001201378 | chr6:+29355866   | Ccdc136 exon                   |
|          |                         |                 | Nf1_OT4         | CAGATGATCGGGCAGATCGATGG | 4MMs [8:10:12:15] | NM_019694    | chr5:-34087729   | Letm1 exon                     |
|          |                         |                 | Nf1_OT5         | CAGCTGGGCCCCACATTGACGG  | 4MMs [4:7:11:18]  | NM_023633    | chr12:-85293126  | R2410016O06Rik exon            |
| Tet2.4   | GAACAAGCTCTACATCCCGTAGG | chr3:+133149224 | Tet2_OT1        | GGACAAGTTCACATCCGCAAG   | 4MMs [2:8:11:20]  | NM_146086    | chr18:+61416955  | Pde6a exon                     |
|          |                         |                 | Tet2_OT2        | GAAGCAGCTCTCCATCCCTTCGG | 4MMs [4:5:12:19]  | NM_145741    | chr14:-34745345  | Gdf10 exon                     |
|          |                         |                 | Tet2_OT3        | GAAGAAGCTCAGCATCTCGTCAG | 4MMs [4:11:12:17] | NM_028816    | chr7:+133252384  | Xpo6 exon                      |
|          |                         |                 | Tet2_OT4        | GAGGAAGCTCTACATCCTGGAGG | 4MMs [3:4:18:20]  | NM_031257    | chr8:-26182382   | Plekha2 intron                 |
|          |                         |                 | Tet2_OT5        | TACCAAGCTCTACATCCTCTTGG | 4MMs [1:3:18:19]  | NM_199252    | chr17:-13302577  | Unc93a exon                    |
| Smc3.3   | CTCCAGTCAGAGCACCTCGATGG | chr19:-53708484 | Smc3_OT1        | CTCAAGTCAGAGAACCTCGCGGG | 3MMs [4:13:20]    | NM_198642    | chr14:-75415982  | 5031414D18Rik gene, CpG island |
|          |                         |                 | Smc3_OT2        | CCCCACACACAGCACCTCGACAG | 4MMs [2:6:7:10]   | NM_144803    | chr14:+66771517  | Chrna2 exon                    |
|          |                         |                 | Smc3_OT3        | CTTCAGGCTGAGCACCTCGCAGG | 4MMs [3:7:9:20]   | NM_011904    | chr19:-41163120  | Tll2 intron, CpG island        |
|          |                         |                 | Smc3_OT4        | CTCCAGAAAGAACACCTCGCTAG | 4MMs [7:8:12:20]  | NM_023878    | chr14:-119260844 | Cldn10 intron                  |
|          |                         |                 | Smc3_OT5        | ACCCAGTCTGAGCACCTGGAAGG | 4MMs [1:2:9:18]   | NM_001080815 | chr7:+19744847   | Gipr intron-exon               |
| Dnmt3a.1 | GTGGGCATGGTGCGCACCAAGG  | chr12:+3901625  | Dnmt3_OT1       | GTGAGCCAGGTGGGGCACACAG  | 4MMs [4:7:8:13]   | NM_013908    | chr2:+25359855   | Fbxw5 intron                   |
|          |                         |                 | Dnmt3_OT2       | GTGGGCAAGGGGCGCAACACAG  | 3MMs [8:11:18]    | NM_001220499 | chr4:-155506697  | Rnf223 gene                    |
|          |                         |                 | Dnmt3_OT3       | ATGGGCATGAAGTGCCACCATGG | 4MMs [1:10:11:13] | NM_178627    | chr15:+82967944  | Poldip3 exon, unbalanced       |
|          |                         |                 | Dnmt3_OT4       | ATGGACATGGGGCGGCACAAAGG | 4MMs [1:5:11:19]  | NM_201407    | chr3:+90072469   | Dennd4b, unbalanced            |
|          |                         |                 | Dnmt3_OT5       | GTGGCCTGTTGCGTCCACATGG  | 4MMs [5:7:10:15]  | NM_001081302 | chr15:-27781515  | Trio intron                    |
| Ezh2.3   | AAGACACCACCTAAACGCCAAGG | chr6:+47495847  | Ezh2_OT1        | CAGCTACCACCCAAACGCCCCAG | 4MMs [1:4:5:12]   | NM_172434    | chr3:+94282696   | Celf3 intron                   |
|          |                         |                 | Ezh2_OT2        | GTGACACCCCTAAACTCCCTAG  | 4MMs [1:2:9:17]   | NM_027627    | chr16:+90831218  | C21orf63 exon                  |
|          |                         |                 | Ezh2_OT3        | AACTCAGCACCTAAAAGCCCAAG | 4MMs [3:4:7:16]   | NM_133762    | chr12:-117663077 | Ncapp2 intro-exon              |
|          |                         |                 | Ezh2_OT4        | GAGAGACCACATAAAAGCCCAAG | 4MMs [1:5:11:16]  | NM_001081467 | chr5:+134868172  | Gtf2ird1 intron                |
|          |                         |                 | Ezh2_OT5        | AAGACACAGGCTAAAAGCCCGGG | 4MMs [8:9:10:16]  | NM_027667    | chr19:+41847484  | Arhgap19 intron                |

Supplementary Table 4 – Percentages of mutated sequencereads at off-target sites

|           | WT | Figure 3 | Supplementary Figure 12 | Supplementary Figure 15 | Supplementary Figure 16 |
|-----------|----|----------|-------------------------|-------------------------|-------------------------|
| Runx1_OT1 | 0% | 0%       | 0%                      | 0%                      | 0%                      |
| Runx1_OT2 | 0% | 0%       | 0%                      | 0%                      | 0%                      |
| Runx1_OT3 | 0% | 0%       | 0%                      | 0%                      | 0%                      |
| Runx1_OT4 | 0% | 0%       | 0%                      | 0%                      | 0%                      |
| Runx1_OT5 | 0% | 0%       | 0%                      | 0%                      | 0%                      |
| Nf1_OT1   | 0% | 0%       | 0%                      | 0%                      | 0%                      |
| Nf1_OT2   | 0% | 0%       | 0%                      | 0%                      | 0%                      |
| Nf1_OT3   | 0% | 0%       | 0%                      | 0%                      | 0%                      |
| Nf1_OT4   | 0% | 0%       | 0%                      | 0%                      | 0%                      |
| Nf1_OT5   | 0% | 0%       | 0%                      | 0%                      | 0%                      |
| Tet2_OT1  | 0% | 0%       | 0%                      | 0%                      | 0%                      |
| Tet2_OT2  | 0% | 0%       | 0%                      | 0%                      | 0%                      |
| Tet2_OT3  | 0% | 0%       | 0%                      | 0%                      | 0%                      |
| Tet2_OT4  | 0% | 0%       | 0%                      | 0%                      | 0%                      |
| Tet2_OT5  | 0% | 0%       | 0%                      | 0%                      | 0%                      |
| Smc3_OT1  | 0% | 0%       | 0%                      | 0%                      | 0%                      |
| Smc3_OT2  | 0% | 0%       | 0%                      | 0%                      | 0%                      |
| Smc3_OT3  | 0% | 0%       | 0%                      | 0%                      | 0%                      |
| Smc3_OT4  | 0% | 0%       | 0%                      | 0%                      | 0%                      |
| Smc3_OT5  | 0% | 0%       | 0%                      | 0%                      | 0%                      |
| Dnmt3_OT1 | 0% | 0%       | 0%                      | 0%                      | 0%                      |
| Dnmt3_OT2 | 0% | 0%       | 0%                      | 0%                      | 0%                      |
| Dnmt3_OT3 | 0% | 0%       | 0%                      | 0%                      | 0%                      |
| Dnmt3_OT4 | 0% | 0%       | 0%                      | 0%                      | 0%                      |
| Dnmt3_OT5 | 0% | 0%       | 0%                      | 0%                      | 0%                      |
| Ezh2_OT1  | 0% | 0%       | 0%                      | 0%                      | 0%                      |
| Ezh2_OT2  | 0% | 0%       | 0%                      | 0%                      | 0%                      |
| Ezh2_OT3  | 0% | 0%       | 0%                      | 0%                      | 0%                      |
| Ezh2_OT4  | 0% | 0%       | 0%                      | 0%                      | 0%                      |
| Ezh2_OT5  | 0% | 0%       | 0%                      | 0%                      | 0%                      |

Off-target sites (column 1) are listed in supplementary Table 3. Top row indicates where respective leukemias are presented. A C57Bl/6 (WT) control was included.
